# Supplementary material for: miRSystem: An Integrated System for Characterizing Enriched Functions and Pathways of MicroRNA Targets
Source: PLOS journal article supplement (doi:10.1371/journal.pone.0042390), 2012-08-01
Supplement: S4 (10.1371/journal.pone.0042390.s004) [file journal.pone.0042390.s004]

**Table S2 – Prediction algorithms and databases available in miRSystem**

| Source                                           | Version <sup>a</sup> | Original Records | Mappable Number <sup>b</sup> |
|--------------------------------------------------|----------------------|------------------|------------------------------|
| <b>DIANA-microT</b>                              | <b>10</b>            | <b>1,450,653</b> | <b>1,413,583</b>             |
| <b>miRanda</b>                                   | <b>11</b>            | <b>927,867</b>   | <b>910,940</b>               |
| <b>mirBridge<sup>c</sup></b>                     | 10                   | 41,382           | 41,382                       |
| <b>PicTar<sup>d</sup></b>                        | 9.1                  | 69,642           | 59,479                       |
| <b>PITA</b>                                      | 11                   | 209,579          | 206,474                      |
| <b>rna22</b>                                     | 8                    | 296,518          | 219,395                      |
| <b>TargetScan<sup>e</sup></b>                    | 16                   | 110,284          | 110,284                      |
| <b>TarBase<br/>and<br/>miRecords<sup>f</sup></b> | 6-16                 | 1,661            | 1,575                        |

<sup>a</sup>The version mapped to miRBase.

<sup>b</sup>Number of mappable records in miRBase version 17.

<sup>c</sup>The records of miRBridge were collected from the supplementary data.

<sup>d</sup>The information about PicTar was obtained from UCSC Genome Browser.

<sup>e</sup>Families IDs were converted to single miRNA IDs to get complete miRNA-gene matching data.

<sup>f</sup>Merged together as experimentally validated datasets.
