# Supplementary material for: miRSystem: An Integrated System for Characterizing Enriched Functions and Pathways of MicroRNA Targets
Source: PLOS journal article supplement (doi:10.1371/journal.pone.0042390), 2012-08-01
Supplement: S8 (10.1371/journal.pone.0042390.s008) [file journal.pone.0042390.s008]

**Table S6 –Top 3 enriched pathways of the 5 miRNAs identified in GSE19536 by**

**(A) functional annotation summary and (B) pathway ranking summary in miRSystem**

**(A) Functional annotation summary**

| Database | Item                  | Gene | Raw <sup>a</sup>      | Empirical <sup>b</sup> |
|----------|-----------------------|------|-----------------------|------------------------|
| REACTOME | APOPTOSIS             | 8    | 1.33*10 <sup>-5</sup> | 7.59*10 <sup>-4</sup>  |
| REACTOME | AXON_GUIDANCE         | 11   | 4.23*10 <sup>-6</sup> | 1.74*10 <sup>-3</sup>  |
| REACTOME | DEVELOPMENTAL_BIOLOGY | 13   | 6.35*10 <sup>-5</sup> | 4.84*10 <sup>-3</sup>  |

<sup>a</sup>Raw *P*-values were obtained by a hypergeometric test.

<sup>b</sup>Empirical *P*-values were compared with 1,000 random selections.

**(B) Pathway ranking summary**

| Database | Item                  | Gene | Score <sup>a</sup> |
|----------|-----------------------|------|--------------------|
| REACTOME | DEVELOPMENTAL_BIOLOGY | 91   | 4.035              |
| REACTOME | AXON_GUIDANCE         | 61   | 3.732              |
| KEGG     | FOCAL_ADHESION        | 47   | 3.044              |

<sup>a</sup>Score was calculated based on the weighted pathway-ranking method described in “Methods”.
